# Supplementary material for: Determinants of COVID-19 outcomes: A systematic review
Source: medRxiv preprint, doi:10.1101/2021.03.21.21254068, version 1 (2021-03-23)
Supplement: Supplemental table 1 [file 254068_file03.docx]

Determinants of COVID-19 outcomes: A systematic review

Supplementary information 1: Full search strategy

| Database | Search terms | Date searched |
| --- | --- | --- |
| Scopus | (Determinant* OR Risk factor* OR Predictor*) AND (COVID-19 OR Coronavirus OR 2019 nCOV-2 OR SARS-COV-2) AND (Death OR Mortality*) AND (Length of hospitalisation stay OR Admission duration OR admission* length OR hospital* length). | 21st December 2020 |
| Google Scholar | (Determinant* OR Risk factor* OR Predictor*) AND (COVID-19 OR Coronavirus OR 2019 nCOV-2 OR SARS-COV-2) AND (Death OR Mortality*) AND (Length of hospitalisation stay OR Admission duration OR admission* length OR hospital* length). | 23rd December 2020 |
| CINAHL | (Determinant* OR Risk factor* OR Predictor*) AND (COVID-19 OR Coronavirus OR 2019 nCOV-2 OR SARS-COV-2) AND (Death OR Mortality*) AND (Length of hospitalisation stay OR Admission duration OR admission* length OR hospital* length). | 27th December 2020 |
| Web of Science | (Determinant* OR Risk factor* OR Predictor*) AND (COVID-19 OR Coronavirus OR 2019 nCOV-2 OR SARS-COV-2) AND (Death OR Mortality*) AND (Length of hospitalisation stay OR Admission duration OR admission* length OR hospital* length). | 30th – 31st December 2020 |
